# Supplementary material
Source: HighWire-hosted journal article supplement (http://rc.rcjournal.com/highwire/filestream/28214/field_highwire_adjunct_files/0/rc-12005-File005.docx)
Supplement: rc-12005-File005.docx [file rc-12005-File005.docx]

**The impact of increased positive end-expiratory pressure on hemodynamics, respiratory mechanics, and oxygenation in pediatric acute respiratory distress syndrome**

**Authors:**

Fernanda Monteiro Diniz Junqueira, MD1; Isabel de Siqueira Ferraz, MD1; Fábio Joly Campos, MD, PhD2; Toshio Matsumoto, MD3; Marcelo Barciela Brandão, MD, PhD1; Roberto José Negrão Nogueira, MD, PhD1, 4; Tiago Henrique de Souza, MD, PhD1*

**Affiliations:**

1. Pediatric Intensive Care Unit, Department of Pediatrics, Clinics Hospital of the State University of Campinas (UNICAMP), Campinas, SP, Brazil.
2. Department of Pediatrics, Botucatu Medical School, Sao Paulo State University Júlio de Mesquita Filho (UNESP), Botucatu, SP, Brazil
3. Intensive Care Society of Sao Paulo, Sao Paulo, SP, Brazil
4. Department of Pediatrics, School of Medicine São Leopoldo Mandic, Campinas, SP, Brazil

**Address correspondence to:** Tiago Henrique de Souza (https://orcid.org/0000-0001-6944-0221), Pediatric Intensive Care Unit, Department of Pediatrics, State University of Campinas (UNICAMP); 126, Tessália Vieira de Camargo Street. ZIPCODE 13083-887 Campinas, SP, Brazil. E-mail: [thsouza@unicamp.br](mailto:thsouza@unicamp.br)

**Funding Source:** No external funding for this manuscript.

**Financial Disclosure:** The authors have no financial relationships relevant to this study to disclose.

**Table of Contents**

[1. Post-hoc analysis for pairwise comparison of data collected at different PEEP level according to Conover (1). Significance was defined as p < 0.05. 3](#_Toc143186881)

[Variable: Heart rate 3](#_Toc143186882)

[Variable: Cardiac index 3](#_Toc143186883)

[Variable: Stroke volume index 3](#_Toc143186884)

[Variable: Aortic velocity-time integral 3](#_Toc143186885)

[Variable: Aortic blood flow peak velocity variation 4](#_Toc143186886)

[Variable: Pulmonary velocity-time integral 4](#_Toc143186887)

[Variable: Peak inspiratory pressure 4](#_Toc143186888)

[Variable: Mean airway pressure 4](#_Toc143186889)

[Variable: Plateau pressure 5](#_Toc143186890)

[Variable: Static compliance 5](#_Toc143186891)

[Variable: Dynamic compliance 5](#_Toc143186892)

[Variable: Inspiratory flow resistance 5](#_Toc143186893)

[Variable: Inspired fraction of oxygen 6](#_Toc143186894)

[Variable: Peripheral oxygen saturation 6](#_Toc143186895)

[Variable: Oxygen saturation index 6](#_Toc143186896)

[Variable: Estimated oxygen delivery index 6](#_Toc143186897)

[2. Accuracy of devices used in the study 7](#_Toc143186898)

[2.1 Mechanical ventilator 7](#_Toc143186899)

[2.2 Bedside monitor 7](#_Toc143186900)

[2.3 Ultrasound machine 7](#_Toc143186901)

[3. REFERENCE 8](#_Toc143186902)

- - - 1. **Post-hoc analysis for pairwise comparison of data collected at different PEEP level according to Conover (1). Significance was defined as *p* < 0.05.**

## Variable: Heart rate

| Data collected at the PEEP level of: | Mean rank | Different (*p*<0.05) from variable number: |
| --- | --- | --- |
| (1) PEEP 5 cmH2O | 3.6452 | (4) (5) |
| (2) PEEP 12 cmH2O | 3.0968 | (5) |
| (3) PEEP 10 cmH2O | 3.2581 | (5) |
| (4) PEEP 8 cmH2O | 2.9032 | (1) (5) |
| (5) PEEP 5 cmH2O | 2.0968 | (1) (2) (3) (4) |

Minimum required difference of mean rank: 0.7225

## Variable: Cardiac index

| Data collected at the PEEP level of: | Mean rank | Different (*p*<0.05) from variable number: |
| --- | --- | --- |
| (1) PEEP 5 cmH2O | 3.6290 | (2) |
| (2) PEEP 12 cmH2O | 2.1129 | (1) (3) (4) (5) |
| (3) PEEP 10 cmH2O | 2.9194 | (2) |
| (4) PEEP 8 cmH2O | 2.9032 | (2) |
| (5) PEEP 5 cmH2O | 3.4355 | (2) |

Minimum required difference of mean rank: 0.7473

## Variable: Stroke volume index

| Data collected at the PEEP level of: | Mean rank | Different (*p*<0.05) from variable number: |
| --- | --- | --- |
| (1) PEEP 5 cmH2O | 3.6290 | (2) (3) |
| (2) PEEP 12 cmH2O | 1.9355 | (1) (4) (5) |
| (3) PEEP 10 cmH2O | 2.5484 | (1) (5) |
| (4) PEEP 8 cmH2O | 2.9516 | (2) (5) |
| (5) PEEP 5 cmH2O | 3.9355 | (2) (3) (4) |

Minimum required difference of mean rank: 0.6895

## Variable: Aortic velocity-time integral

| Data collected at the PEEP level of: | Mean rank | Different (*p*<0.05) from variable number: |
| --- | --- | --- |
| (1) PEEP 5 cmH2O | 3.6290 | (2) (3) |
| (2) PEEP 12 cmH2O | 1.9355 | (1) (4) (5) |
| (3) PEEP 10 cmH2O | 2.5484 | (1) (5) |
| (4) PEEP 8 cmH2O | 2.9516 | (2) (5) |
| (5) PEEP 5 cmH2O | 3.9355 | (2) (3) (4) |

Minimum required difference of mean rank: 0.6895

## Variable: Aortic blood flow peak velocity variation

| Data collected at the PEEP level of: | Mean rank | Different from: |
| --- | --- | --- |
| (1) PEEP 5 cmH2O | 3.2903 |  |
| (2) PEEP 12 cmH2O | 3.6290 | (3) (4) (5) |
| (3) PEEP 10 cmH2O | 2.7258 | (2) |
| (4) PEEP 8 cmH2O | 2.6452 | (2) |
| (5) PEEP 5 cmH2O | 2.7097 | (2) |

Minimum required difference of mean rank: 0.7596

## Variable: Pulmonary velocity-time integral

| Data collected at the PEEP level of: | Mean rank | Different from: |
| --- | --- | --- |
| (1) PEEP 5 cmH2O | 3.4839 | (2) (3) |
| (2) PEEP 12 cmH2O | 2.1290 | (1) (4) (5) |
| (3) PEEP 10 cmH2O | 2.5323 | (1) (5) |
| (4) PEEP 8 cmH2O | 3.1452 | (2) |
| (5) PEEP 5 cmH2O | 3.7097 | (2) (3) |

Minimum required difference of mean rank: 0.7261

## Variable: Peak inspiratory pressure

| Data collected at the PEEP level of: | Mean rank | Different from: nr |
| --- | --- | --- |
| (1) PEEP 5 cmH2O | 2.1452 | (2) (3) (4) (5) |
| (2) PEEP 12 cmH2O | 4.8387 | (1) (3) (4) (5) |
| (3) PEEP 10 cmH2O | 3.7097 | (1) (2) (4) (5) |
| (4) PEEP 8 cmH2O | 2.8226 | (1) (2) (3) (5) |
| (5) PEEP 5 cmH2O | 1.4839 | (1) (2) (3) (4) |

Minimum required difference of mean rank: 0.4073

## Variable: Mean airway pressure

| Data collected at the PEEP level of: | Mean rank | Different from: |
| --- | --- | --- |
| (1) PEEP 5 cmH2O | 1.9032 | (2) (3) (4) (5) |
| (2) PEEP 12 cmH2O | 4.8065 | (1) (3) (4) (5) |
| (3) PEEP 10 cmH2O | 3.9194 | (1) (2) (4) (5) |
| (4) PEEP 8 cmH2O | 2.9516 | (1) (2) (3) (5) |
| (5) PEEP 5 cmH2O | 1.4194 | (1) (2) (3) (4) |

Minimum required difference of mean rank: 0.3551

## Variable: Plateau pressure

| Data collected at the PEEP level of: | Mean rank | Different from: |
| --- | --- | --- |
| (1) PEEP 5 cmH2O | 1.7581 | (2) (3) (4) |
| (2) PEEP 12 cmH2O | 5.0000 | (1) (3) (4) (5) |
| (3) PEEP 10 cmH2O | 3.7742 | (1) (2) (4) (5) |
| (4) PEEP 8 cmH2O | 2.9194 | (1) (2) (3) (5) |
| (5) PEEP 5 cmH2O | 1.5484 | (2) (3) (4) |

Minimum required difference of mean rank: 0.3249

## Variable: Static compliance

| Data collected at the PEEP level of: | Mean rank | Different from: |
| --- | --- | --- |
| (1) PEEP 5 cmH2O | 3.5806 | (2) (3) |
| (2) PEEP 12 cmH2O | 1.4032 | (1) (3) (4) (5) |
| (3) PEEP 10 cmH2O | 2.5161 | (1) (2) (4) (5) |
| (4) PEEP 8 cmH2O | 3.6129 | (2) (3) |
| (5) PEEP 5 cmH2O | 3.8871 | (2) (3) |

Minimum required difference of mean rank: 0.5625

## Variable: Dynamic compliance

| Data collected at the PEEP level of: | Mean rank | Different from: |
| --- | --- | --- |
| (1) PEEP 5 cmH2O | 2.7581 | (2) (4) |
| (2) PEEP 12 cmH2O | 2.0000 | (1) (3) (4) (5) |
| (3) PEEP 10 cmH2O | 3.2097 | (2) |
| (4) PEEP 8 cmH2O | 3.7097 | (1) (2) |
| (5) PEEP 5 cmH2O | 3.3226 | (2) |

Minimum required difference of mean rank: 0.6863

## Variable: Inspiratory flow resistance

| Data collected at the PEEP level of: | Mean rank | Different from: |
| --- | --- | --- |
| (1) PEEP 5 cmH2O | 4.3226 | (2) (3) (4) |
| (2) PEEP 12 cmH2O | 1.6613 | (1) (4) (5) |
| (3) PEEP 10 cmH2O | 1.9677 | (1) (4) (5) |
| (4) PEEP 8 cmH2O | 2.9355 | (1) (2) (3) (5) |
| (5) PEEP 5 cmH2O | 4.1129 | (2) (3) (4) |

Minimum required difference of mean rank: 0.5095

## Variable: Inspired fraction of oxygen

| Data collected at the PEEP level of: | Mean rank | Different from: |
| --- | --- | --- |
| (1) PEEP 5 cmH2O | 3.3065 | (3) (4) (5) |
| (2) PEEP 12 cmH2O | 3.0806 |  |
| (3) PEEP 10 cmH2O | 2.8710 | (1) |
| (4) PEEP 8 cmH2O | 2.7903 | (1) |
| (5) PEEP 5 cmH2O | 2.9516 | (1) |

Minimum required difference of mean rank: 0.2973

## Variable: Peripheral oxygen saturation

| Data collected at the PEEP level of: | Mean rank | Different from: |
| --- | --- | --- |
| (1) PEEP 5 cmH2O | 2.3548 | (2) (3) |
| (2) PEEP 12 cmH2O | 3.1613 | (1) |
| (3) PEEP 10 cmH2O | 3.6290 | (1) (5) |
| (4) PEEP 8 cmH2O | 3.0323 |  |
| (5) PEEP 5 cmH2O | 2.8226 | (3) |

Minimum required difference of mean rank: 0.6833

## Variable: Oxygen saturation index

| Data collected at the PEEP level of: | Mean rank | Different from: |
| --- | --- | --- |
| (1) PEEP 5 cmH2O | 2.3710 | (2) (3) (5) |
| (2) PEEP 12 cmH2O | 4.7903 | (1) (3) (4) (5) |
| (3) PEEP 10 cmH2O | 3.7742 | (1) (2) (4) (5) |
| (4) PEEP 8 cmH2O | 2.7258 | (2) (3) (5) |
| (5) PEEP 5 cmH2O | 1.3387 | (1) (2) (3) (4) |

Minimum required difference of mean rank: 0.4377

## Variable: Estimated oxygen delivery index

| Data collected at the PEEP level of: | Mean rank | Different from: |
| --- | --- | --- |
| (1) PEEP 5 cmH2O | 3.7903 | (2) (3) (4) |
| (2) PEEP 12 cmH2O | 2.1290 | (1) (3) (5) |
| (3) PEEP 10 cmH2O | 3.0323 | (1) (2) |
| (4) PEEP 8 cmH2O | 2.8226 | (1) |
| (5) PEEP 5 cmH2O | 3.2258 | (2) |

Minimum required difference of mean rank: 0.7453

- - - 1. **Accuracy of devices used in the study**
  1. **Mechanical ventilator - Hamilton-C1 (Hamilton Medical AG, Bonaduz, Switzerland)**

Accuracy of control settings and monitored parameters.

| **Control settings accuracy** | |
| --- | --- |
| PEEP (cmH2O) | ± 1cmH2O or ± 5%, whichever is greater |
| Oxygen (%) | ± (volume fraction of 2.5% + 2.5% gas level) |
| **Monitored parameters accuracy** | |
| Auto-PEEP (cmH2O) | ± 2cmH2O + 4% of actual reading |
| PEEP (cmH2O) | ± 2cmH2O + 4% of actual reading |
| Mean airway pressure (cmH2O) | ± 2cmH2O + 4% of actual reading |
| Peak inspiratory pressure (cmH2O) | ± 2cmH2O + 4% of actual reading |
| Plateau pressure (cmH2O) | ± 2cmH2O + 4% of actual reading |
| Expiratory tidal volume (ml) | ±10% or ±10 ml, whichever is greater |

The full description of accuracy is available *on the Hamilton Medical website: https://www.hamilton-medical.com/pt/Resource-center.html?ventilator=5db4d6d0-6fed-4b59-806e-edd19510d2cf&category=736b1b51-b3d2-4048-a64f-9bc268167da2&tab=d7dd4b8e-1047-4c29-a404-da2b41f2fa29&resource-lang=en&resource-detail-type=document&resource-detail-id=753ca119-aa50-4301-a2a9-45740b37cb1e*

*(see page 281-290)*

- 1. **Bedside monitor - Life Scope G5 monitors (CSM-1500; Nihon Kohden, Tokyo, Japan)**

Heart rate – precision of ± 2 bpm

Non-invasive arterial blood pressure – precision of ± 3 mmHg

Peripheral oxygen saturation – precision of ± 3%

The full description of precision is available at

<https://consultas.anvisa.gov.br/api/consulta/produtos/25351737421201411/anexo/T19765479/nomeArquivo/CSM%201900%201700%201500_4_Parte3.pdf?Authorization=Guest>

*(see chapter 17)*

- 1. **Ultrasound machine - GE Vivid q (GE Healthcare, Tirat Carmel, Israel)**

Spectral Doppler measurements – accuracy of 6%

The full description of precision is available at

[*https://customer-doc.cloud.gehealthcare.com/copyDoc/5407782-100/3*](https://customer-doc.cloud.gehealthcare.com/copyDoc/5407782-100/3)*).*

*(see page 63)*

# REFERENCE

1. Conover WJ: Practical nonparametric statistics. 3rd edition. New York: John Wiley & Sons; 1999.
